# Supplementary material for: A specific fluorescent probe for NO based on a new NO-binding group
Source: Royal Society of Chemistry journal article supplement (doi:10.1039/c4cc03540b), 2014-01-01
Supplement: c4cc03540b1.pdf [file c4cc03540b1.pdf]

## Supporting Information

### A specific fluorescent probe for NO based on a new NO binding group

Xin Lv,<sup>a</sup> Yue Wang,<sup>a</sup> Song Zhang,<sup>b</sup> Yawei Liu,<sup>a</sup> Jian Zhang,<sup>a</sup> and Wei Guo<sup>\*,a</sup>

<sup>a</sup> School of Chemistry and Chemical Engineering, Shanxi University, Taiyuan 030006, China. E-mail: [guow@sxu.edu.cn](mailto:guow@sxu.edu.cn).

<sup>b</sup> Shanxi Academy of Analytical Sciences

**1. General information and methods.** All reagents and solvents were purchased from commercial suppliers and used without further purification unless otherwise stated. Deionized water was used throughout all experiments. All reactions were magnetically stirred and monitored by thin layer chromatography (TLC). Column chromatography was conducted over silica gel (mesh 200–300). Fluorescence spectra were taken on HITACHI F-7000 fluorescence spectrometer with the excitation and emission slit widths at 5.0 and 5.0 nm respectively. The <sup>1</sup>H NMR and <sup>13</sup>C NMR spectra were recorded at 300 MHz and 75 MHz, respectively. High resolution mass spectra were obtained on a Varian QFT-ESI mass spectrometer. The following abbreviations were used to explain the multiplicities: s = singlet; d = doublet; t = triplet; q = quartet; m = multiplet; br = broad.

## 2. Synthesis

### Compound 4

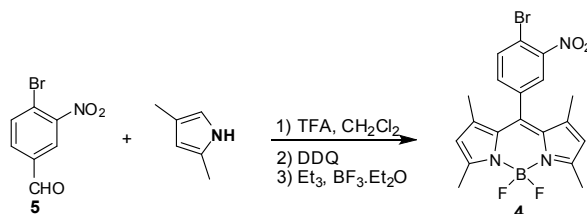

To a solution of 4-Bromo-3-nitrobenzaldehyde **5** (2.30 g, 10 mmol) and 2,4-dimethylpyrrole (1.90 g, 20 mmol) in dry CH<sub>2</sub>Cl<sub>2</sub> (250 mL) under N<sub>2</sub> was added three drops of trifluoroacetic acid. After stirring the mixture for 3 hours at room temperature under

N<sub>2</sub> and in the dark, 2, 3-dicyano-5, 6-dichloroquinone (DDQ, 2.5 g, 11 mmol) was added. The solution immediately turned dark violet, and then was stirred for 30 min at room temperature. Freshly distilled triethylamine (25 mL) was introduced, followed by BF<sub>3</sub>·Et<sub>2</sub>O until green appeared in the solution (~25 mL). The mixture was washed with water and dried over Na<sub>2</sub>SO<sub>4</sub>, filtered, and evaporated to afford a dark oil. The latter was purified by silica gel chromatography with CH<sub>2</sub>Cl<sub>2</sub> : PE = 1 : 1 to yield **4** as a red solid (2.0 g, 4.4 mmol, 44%). <sup>1</sup>H-NMR (CDCl<sub>3</sub>, 300MHz) δ (ppm): 7.93 (d, J = 8.4 Hz, 1H); 7.83 (s, 1H); 7.43 (d, J = 8.4 Hz, 1H); 6.04 (s, 2H); 2.56 (s, 6H); 1.45 (s, 6H). <sup>13</sup>C-NMR (CDCl<sub>3</sub>, 75MHz): 157.9, 151.4, 143.3, 136.9, 134.1, 131.7, 126.6, 123.0, 116.1, 48.2, 16.0. HR MS: calculated for [M]<sup>+</sup>: 447.0565; found: 447.0586.

### Compound 3

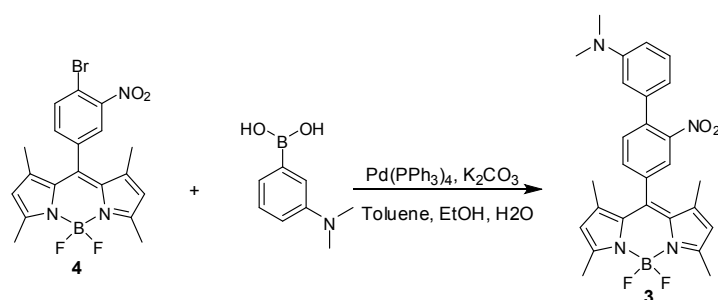

To a suspension of compound **4** (0.223 g, 0.5 mmol), 3-dimethylaminophenylboronic acid (0.165 g, 1 mmol) and K<sub>2</sub>CO<sub>3</sub> (0.690 g, 5 mmol) in toluene (20 mL), were added water (2 mL) and Ethanol (2 mL). The mixture was N<sub>2</sub> flushed, then Pd(PPh<sub>3</sub>)<sub>4</sub> (5 mol%) was introduced. After degassing by bubbling the mixture with N<sub>2</sub> for another 15 min, the reaction mixture was stirred at 80°C for 12 hours under N<sub>2</sub>. The organic phase was washed with saturated NH<sub>4</sub>Cl and water then dried over Na<sub>2</sub>SO<sub>4</sub>, filtered, and evaporated to dryness to afford a dark residue which was purified by column chromatography with CH<sub>2</sub>Cl<sub>2</sub> to yield **3** as red solid (0.15 g, 0.30 mmol, 60%). <sup>1</sup>H-NMR (CDCl<sub>3</sub>, 300MHz) δ (ppm): 7.76 (s, 1H); 7.66 (d, J = 7.5 Hz, 1H); 7.56 (d, J = 8.7 Hz, 1H); 7.30 (s, 1H); 6.72-6.85 (m, 3H); 6.04 (s, 2H); 3.01 (s, 6H); 2.57 (s, 6H); 1.50 (s, 6H). <sup>13</sup>C-NMR (CDCl<sub>3</sub>, 75MHz): 157.2, 151.2, 150.6, 143.2, 138.2, 137.5, 135.5, 133.2, 131.7, 130.2, 124.4, 122.4, 116.5, 113.3, 112.0, 41.1, 15.6. HRMS: calculated for [M+H]<sup>+</sup>: 489.2273; found: 489.2272.

## Probe 1

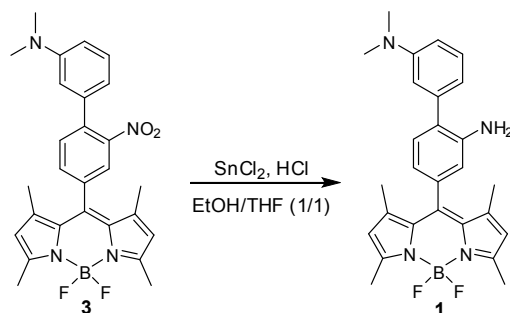

Tin(II) chloride (0.448 g, 2 mmol) and conc. HCl (2.5 ml) were added to a solution of compound **3** (97.6 mg, 0.2 mmol) in THF-EtOH (1:1, 30 ml), and the reaction mixture was stirred for 6 h. A sat. solution of K<sub>2</sub>CO<sub>3</sub> was added and the reaction mixture was partitioned between EtOAc (100 ml) and water (20 ml). The organic phase was separated, washed several times with water, dried over Na<sub>2</sub>SO<sub>4</sub>, filtered, and evaporated to dryness. The residue was purified by column chromatography to yield probe **1** as orange red solid (60 mg, 65%). <sup>1</sup>H-NMR (CDCl<sub>3</sub>, 300MHz) δ (ppm): 7.42 (m, 1H); 7.31(s, 1H); 6.91 (m, 3H); 6.78 (d, J = 8.1 Hz, 1H); 6.73 (s, 1H); 6.07 (s, 2H); 4.01 (b, 2H), 3.10 (s, 6H); 2.64 (s, 6H); 1.69 (s, 6H). <sup>13</sup>C-NMR (CDCl<sub>3</sub>, 75MHz): 156.3, 152.1, 145.5, 144.5, 143.4, 140.7, 135.8, 132.6, 132.2, 130.8, 130.2, 122.2, 118.9, 118.4, 115.7, 114.2, 112.9, 41.9, 15.7. HR MS: calculated for [M+H]<sup>+</sup>: 459.2562; found: 459.2565.

### 3. Preparation of the test solution

DEA•NONOate was synthesized according to the literature.<sup>1</sup> Dehydroascorbic acid (DHA), ascorbic acid (AA), and methylglyoxal (MGO) were purchased from Aldrich and used without further purification. Deionized water and spectroscopic grade EtOH were used for spectroscopic studies. Superoxide solution (O<sub>2</sub><sup>•-</sup>) was prepared by adding KO<sub>2</sub> (1 mg) to dry dimethyl sulfoxide (1 mL) and stirring vigorously for 10 min. Hydroxyl radical (OH•) was generated *in situ* by the Fenton reaction. Singlet oxygen (<sup>1</sup>O<sub>2</sub>) was generated from ClO<sup>-</sup> and H<sub>2</sub>O<sub>2</sub>. Hypochlorite and hydrogen peroxide solution was prepared by dilution of commercial NaClO solution and H<sub>2</sub>O<sub>2</sub>

solution in deionized water. Peroxynitrite was prepared following literature procedure<sup>2</sup> and assayed using a spectrophotometer using  $\epsilon$  302 nm = 1670 cm<sup>-1</sup>M. The aqueous solutions of NaNO<sub>2</sub> and NaNO<sub>3</sub> were freshly prepared and used as nitrite (NO<sub>2</sub><sup>-</sup>) and nitrate (NO<sub>3</sub><sup>-</sup>) sources, respectively. A stock solution of DEA·NONOate was prepared in 0.01M NaOH solution. Various analytes (10 equiv. for NO, ONOO<sup>-</sup> and <sup>1</sup>O<sub>2</sub>; 100 equiv. for others analytes), represented by H<sub>2</sub>O<sub>2</sub>, NO<sub>3</sub><sup>-</sup>, NO<sub>2</sub><sup>-</sup>, HClO, O<sub>2</sub><sup>-</sup>, OH•, AA, DHA, and MGO, were added to the solution of probe **1** (5 μM) in EtOH-PBS buffer (20 mM, pH 7.4, 1:1, v/v), respectively. The resulting solution was kept at 37 °C for 30 min, and then the fluorescence spectra were recorded with excitation at 480 nm.

#### 4. Cell culture and fluorescence imaging:

The HL-7702 cell line was provided by Institute of Biotechnology of Shanxi University. Cells were grown in Dulbecco's Modified Eagle' medium (DMEM) supplemented with 10% FBS (Fetal Bovine Serum) and 1% antibiotics at 37 °C in humidified environment of 5% CO<sub>2</sub>. Cells were plated on 6-well plate and allowed to adhere for 12 hours. Before the experiments, cells were washed with PBS and then incubated with **1** (5 μM) in DMEM medium for 1 h at 37 °C and then washed three times with PBS. After incubating with 50 μM DEA·NONOate for another 1 h at 37 °C, the HL-7702 cells were rinsed with PBS three times, and the fluorescence images were acquired through a fluorescence microscopy OLMPUS-IX51 equipped with camera.

#### Reference

1. R. S. Drago, F. E. Paulik, *J. Am. Chem. Soc.*, 1959, **82**, 96.
2. R. M. Uppu, W. A. Pryor, *Anal. Biochem.*, 1996, **236**, 242.

#### 5. <sup>1</sup>H NMR, <sup>13</sup>C NMR, and HRMS charts

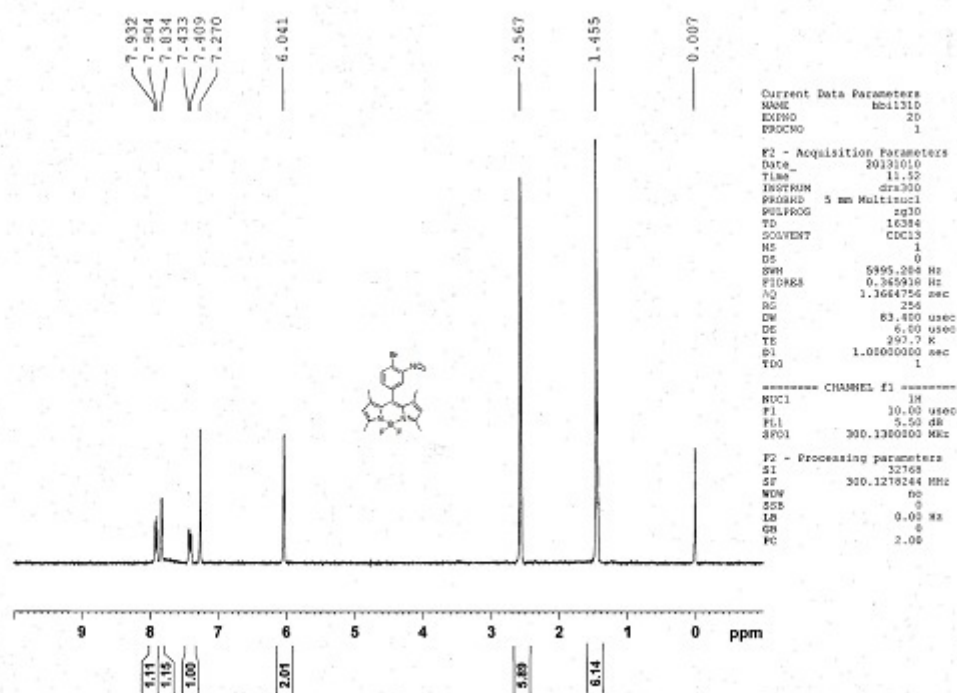

Figure S1  $^1\text{H}$  NMR chart of compound 4 ( $\text{CDCl}_3$ , 300 MHz).

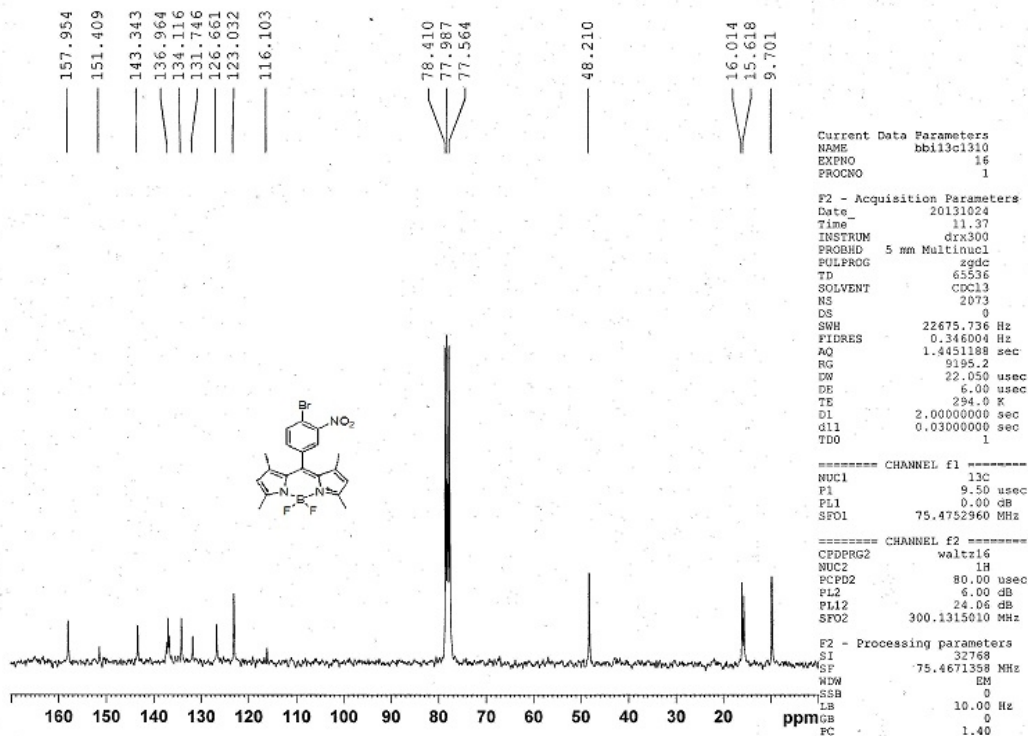

Figure S2  $^{13}\text{C}$  NMR chart of compound 4 ( $\text{CDCl}_3$ , 75 MHz).

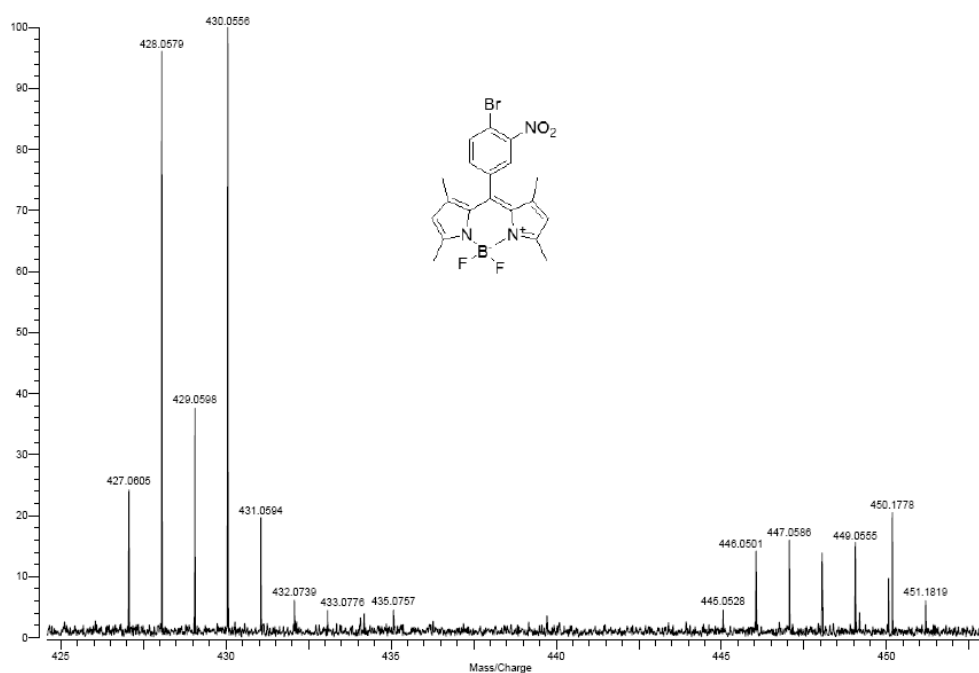

Figure S3 HRMS chart of compound 4.

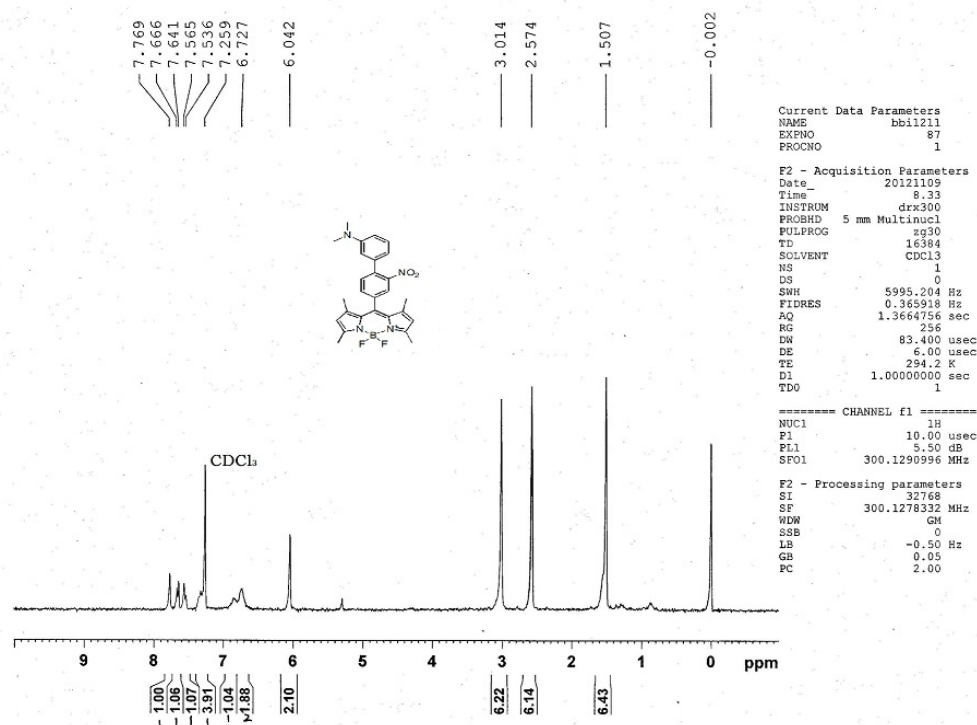

Figure S4 <sup>1</sup>H NMR chart of compound 3 (CDCl<sub>3</sub>, 300 MHz).

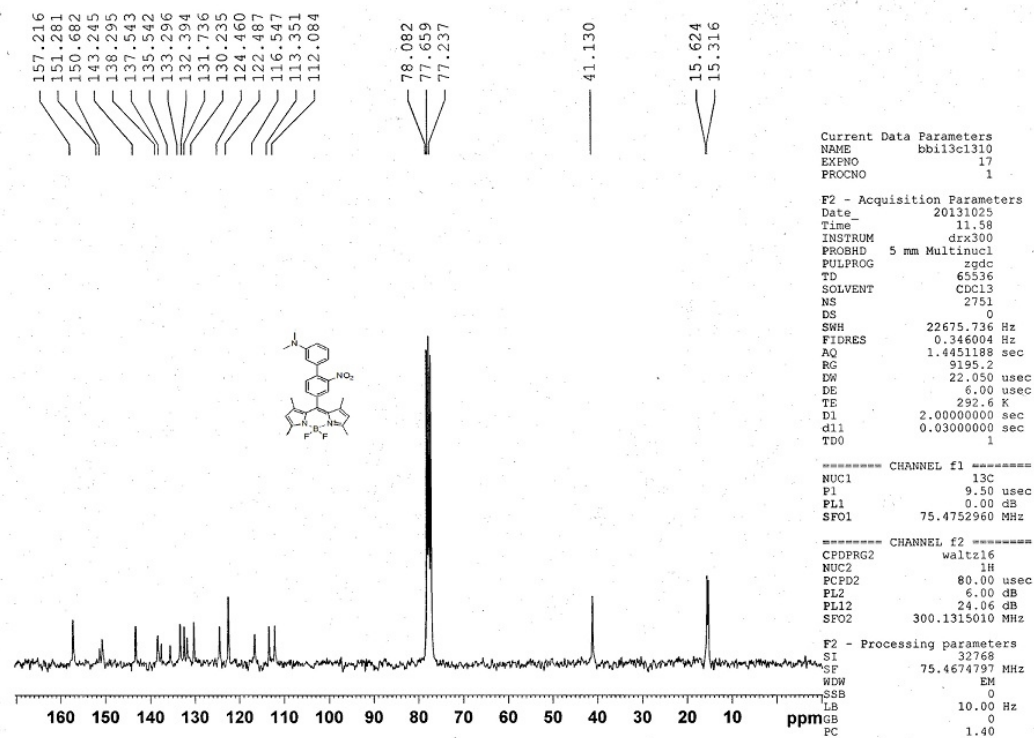

**Figure S5**  $^{13}\text{C}$  NMR chart of compound **3** ( $\text{CDCl}_3$ , 75 MHz).

Varian ProMALDI  
File: LX-2014-5-7-2(2)\_MALDI.trans

Mode: Positive Date: 07-MAY-2014  
Scans: 1 Time: 16:00:52  
Scale: 12.9887

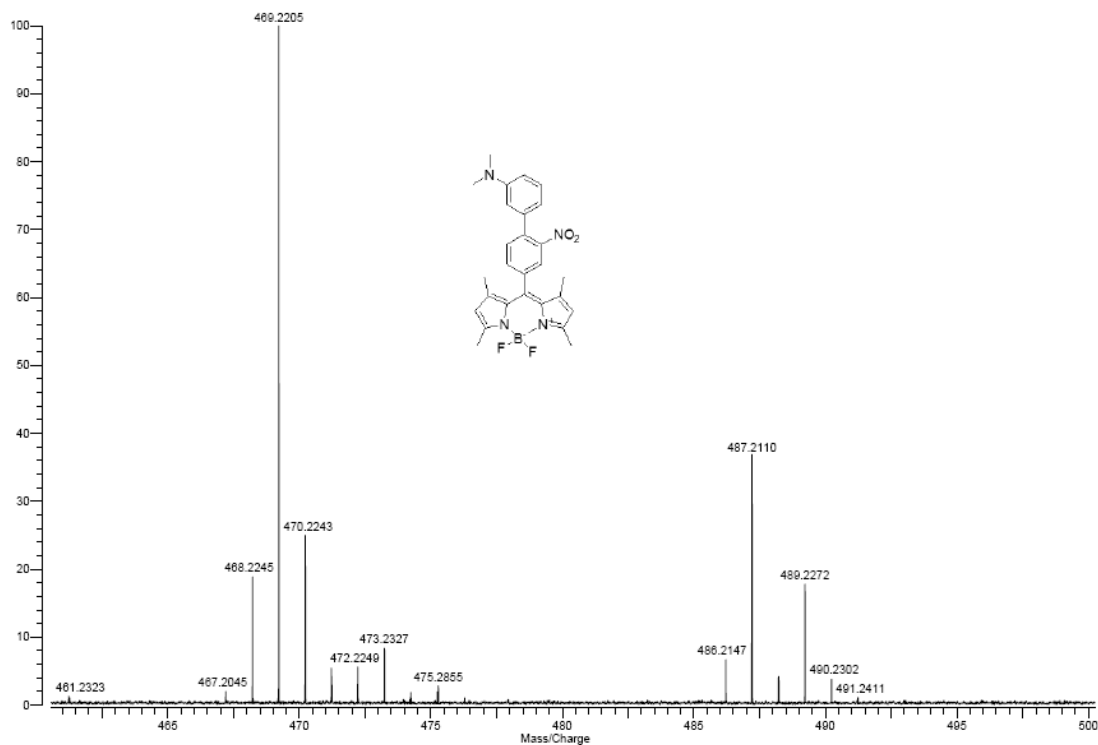

Figure S6 HRMS chart of compound 3.

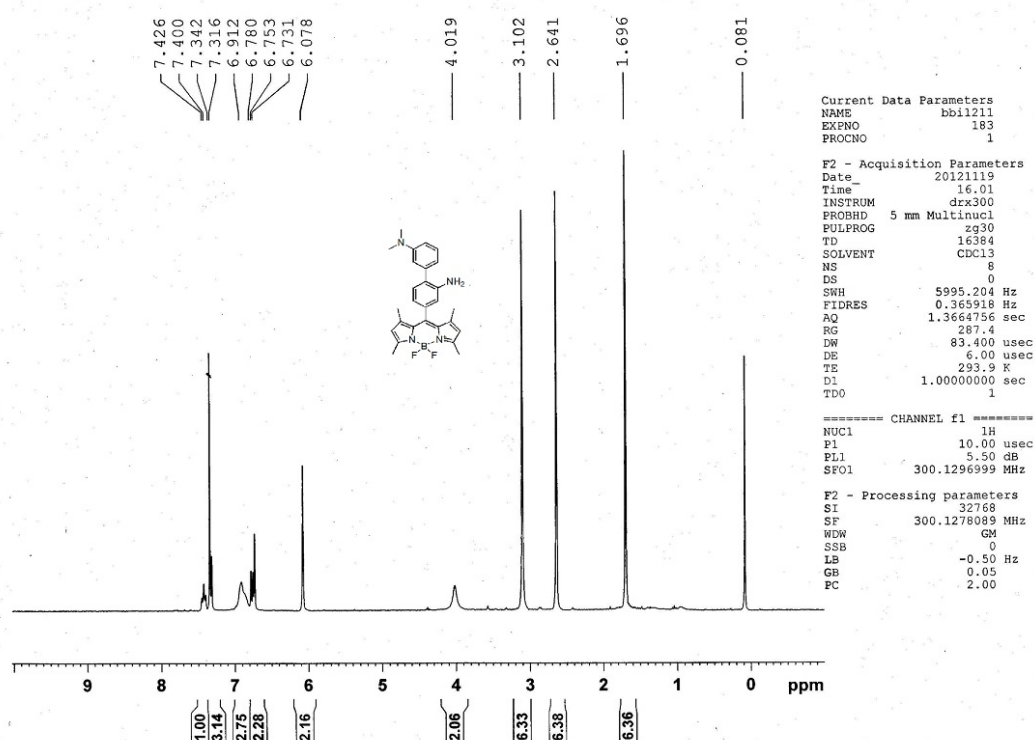

Figure S7 <sup>1</sup>H NMR chart of probe 1 (CDCl<sub>3</sub>, 300 MHz).

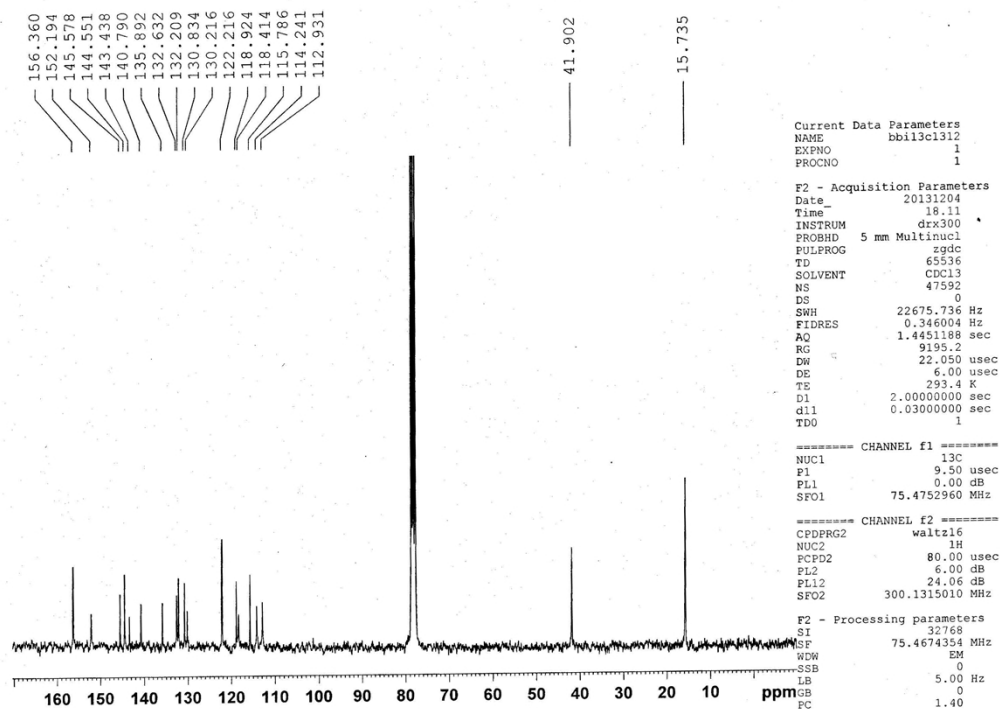

**Figure S8**  $^{13}\text{C}$  NMR chart of probe **1** ( $\text{CDCl}_3$ , 75 MHz).

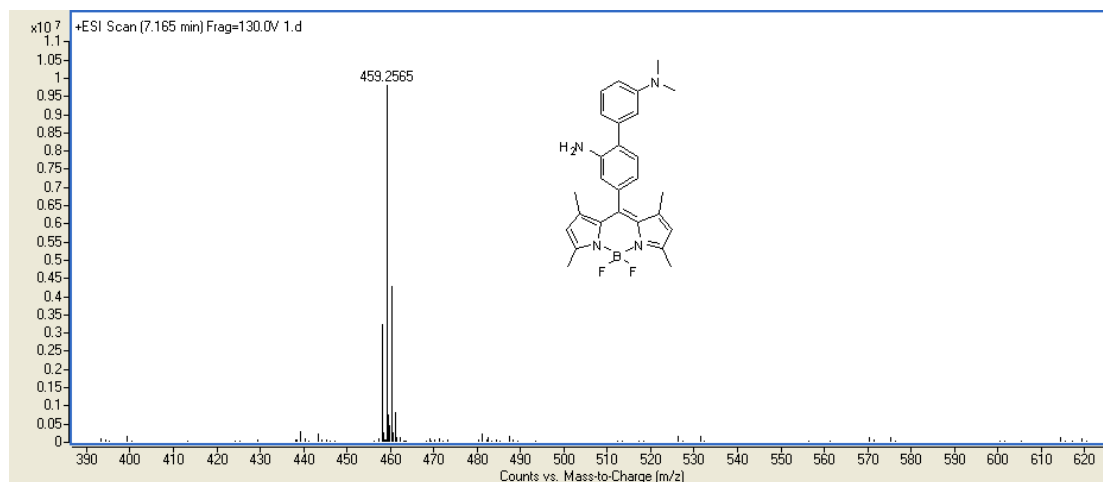

**Figure S9** HRMS charts of probe **1**.

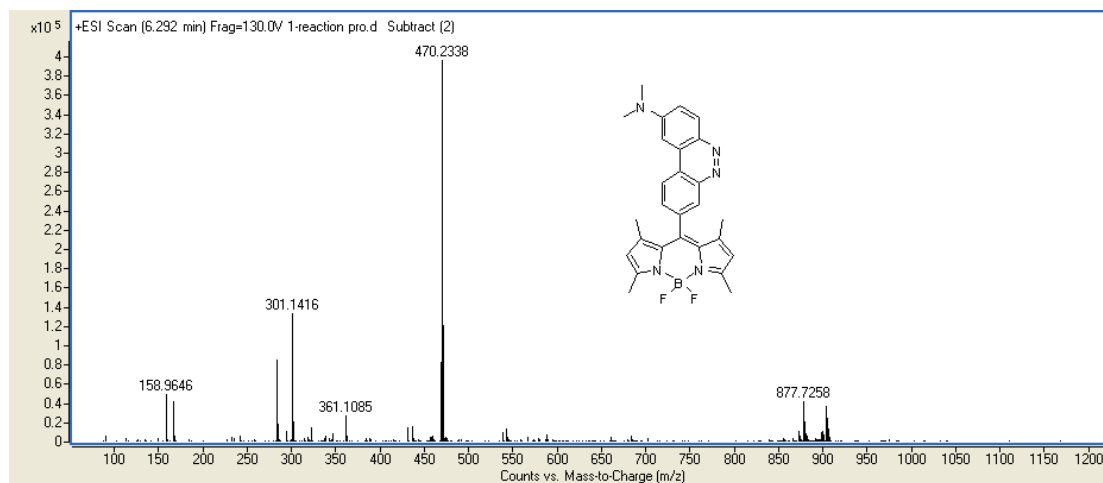

**Figure S10** HRMS charts of product **2**.
